# Supplementary material
Source: HighWire-hosted journal article supplement (https://cmaj.ca/highwire/filestream/59232/field_highwire_adjunct_files/2/apnea-kend-3-at.pdf)
Supplement: apnea-kend-3-at.pdf [file apnea-kend-3-at.pdf]

## Appendix 3 (as supplied by the authors): Results of sensitivity analyses

### Table of Contents

|                                                                                                                                                                                              |   |
|----------------------------------------------------------------------------------------------------------------------------------------------------------------------------------------------|---|
| eTable 3A: Association between obstructive sleep apnea-related predictors and incident cancer after adjustment for the lag time between sleep apnea and cancer diagnosis.....                | 2 |
| eTable 3B: Association between obstructive sleep apnea-related predictors and different subgroups of incident cancer after controlling for sex, age, body mass index and smoking status..... | 3 |
| References.....                                                                                                                                                                              | 3 |

**eTable 3A: Association between obstructive sleep apnea-related predictors and incident cancer after adjustment for the lag time between sleep apnea and cancer diagnosis (on dataset no. 3\*). HR (95% CI).**

| OSA related predictors                                                                                     | All cancers<br>(N total = 9629,<br>n events = 627) | One year lag time<br>(N total = 9476,<br>n events =545) | Two years lag time<br>(N total = 9344,<br>n events = 493) |
|------------------------------------------------------------------------------------------------------------|----------------------------------------------------|---------------------------------------------------------|-----------------------------------------------------------|
| <b>AHI as a categorical variable, univariate association</b>                                               |                                                    |                                                         |                                                           |
| AHI total, events/hour,<br>categories: >30 vs. <5                                                          | 2.02 (1.61-2.54)<br>p<0.0001                       | 2.08 (1.63-2.64)<br>p<0.0001                            | 2.00 (1.55-2.60)<br>p<0.0001                              |
| <b>Model 1: AHI as a continuous variable + risk factors</b> (sex, age, body mass index and smoking status) |                                                    |                                                         |                                                           |
| AHI, total, events/hour,<br>per 10 events                                                                  | 1.01 (0.98-1.04)<br>p=0.6209                       | 1.00 (0.97-1.04)<br>p=0.8680                            | 1.00 (0.96-1.03)<br>p=0.8228                              |
| <b>Model 2: AHI as a categorical variable + risk factors</b>                                               |                                                    |                                                         |                                                           |
| AHI total, events/hour,<br>categories: >30 vs. <5                                                          | 1.02 (0.80-1.30) p=<br>0.8841                      | 1.04 (0.80-1.36)<br>p=0.7507                            | 0.99 (0.75-1.31)<br>p=0.9514                              |
| <b>Model 3: AHI as a categorical variable + risk factors</b>                                               |                                                    |                                                         |                                                           |
| AHI total, events/hour,<br>categories: >43 vs. <18.7†                                                      | 1.03 (0.83-1.27)<br>p=0.8143                       | 1.04 (0.82-1.31)<br>p=0.7356                            | 1.00 (0.78-1.27)<br>p=0.9685                              |
| <b>Model 4: SaO<sub>2</sub> as a continuous variable + risk factors</b>                                    |                                                    |                                                         |                                                           |
| time spent with SaO <sub>2</sub> less than<br>90%, min, per 10 min                                         | 1.00 (0.99-1.02) p=<br>0.6034                      | 1.00 (0.98-1.01)<br>0.8555                              | 1.00 (0.98-1.01)<br>p=0.722                               |
| <b>Model 5: SaO<sub>2</sub> as a categorical variable + risk factors</b>                                   |                                                    |                                                         |                                                           |
| time spent with SaO <sub>2</sub> <90%, %,<br>categories: >12% vs. <1.2% †                                  | 1.12 (0.89-1.41)<br>p=0.3412                       | 1.14 (0.89-1.46)<br>p=0.3069                            | 1.10 (0.85-1.43)<br>p=0.4638                              |

Note: AHI = apnea–hypopnea index; CI = confidence interval; HR = hazard ratio; OSA = obstructive sleep apnea; SaO<sub>2</sub> = oxygen saturation.

\*For a unified presentation of results from subgroup analyses, the findings shown are for a single imputed dataset no. 3. Pooled CIs across imputations for OSA-related variables were at most 2% wider than those presented.

†To attempt to replicate the results of only one clinic-based study that evaluated an association between OSA and incident cancer,(1) we used their categories for AHI (<18.7; 18.7–43; >43) and % of time spent with SaO<sub>2</sub> <90% (<1.2%; 1.2%–12%; >12%). HR (AHI >43 vs. <18.7) = 1.17, 95% CI 0.84–1.65; HR (% of sleep time spent with SaO<sub>2</sub> <90%, categories >12% vs. <1.2%) = 2.33, 95% CI 1.57–3.46.(1)

**eTable 3B: Association between obstructive sleep apnea-related predictors and different subgroups of incident cancer after controlling for sex, age, body mass index and smoking status (on dataset no. 3\*), N total = 9629. HR (95% CI).**

| OSA-related predictors                                                    | All cancers<br>(n events = 627)        | Smoking-related<br>(n events =156)  | Hormone-related<br>(n events = 217) | Detectable by screening<br>(n events = 269) | Not detectable by<br>screening<br>(n events = 358) |
|---------------------------------------------------------------------------|----------------------------------------|-------------------------------------|-------------------------------------|---------------------------------------------|----------------------------------------------------|
| <b>AHI as a categorical variable, univariate association</b>              |                                        |                                     |                                     |                                             |                                                    |
| AHI total, events/hour,<br>categories: >30 vs. <5                         | 2.02 (1.61-2.54)<br><b>p&lt;0.0001</b> | 2.30 (1.46-3.62)<br><b>p=0.0003</b> | 1.32 (0.90-1.93)<br>p=0.1525        | 1.61 (1.15-2.27)<br><b>p=0.0061</b>         | 2.36 (1.74-3.22)<br><b>p&lt;0.0001</b>             |
| <b>Model 1: AHI as a continuous variable + risk factors</b>               |                                        |                                     |                                     |                                             |                                                    |
| AHI, total, events/hour, per 10<br>events                                 | 1.01 (0.98-1.04)<br>p=0.6209           | 1.02 (0.96-1.09)<br>p=0.4900        | 0.97 (0.91-1.03)<br>p=0.2946        | 1.00 (0.95-1.05)<br>p=0.9784                | 1.03 (0.99-1.07)<br>p=0.1731                       |
| <b>Model 2: AHI as a categorical variable + risk factors</b>              |                                        |                                     |                                     |                                             |                                                    |
| AHI total, events/hour,<br>categories: >30 vs. <5                         | 1.02 (0.80-1.30) p=<br>0.8841          | 1.11 (0.69-1.79)<br>p=0.6613        | 0.72 (0.48-1.07)<br>p=0.1042        | 0.90 (0.62-1.28)<br>p=0.5499                | 1.27 (0.92-1.76)<br>p=0.1422                       |
| <b>Model 3: AHI as a categorical variable + risk factors</b>              |                                        |                                     |                                     |                                             |                                                    |
| AHI total, events/hour,<br>categories: >43 vs. <18.7†                     | 1.03 (0.83-1.27)<br>p=0.8143           | 0.95 (0.62-1.46)<br>p=0.8147        | 0.78 (0.53-1.15)<br>p=0.2034        | 1.05 (0.76-1.46)<br>p=0.7620                | 1.12 (0.85-1.47)<br>p=0.4313                       |
| <b>Model 4: SaO<sub>2</sub> as a continuous variable + risk factors</b>   |                                        |                                     |                                     |                                             |                                                    |
| time spent with SaO <sub>2</sub> less than<br>90%, min, per 10 min        | 1.00 (0.99-1.02) p=<br>0.6034          | 1.03 (1.01-1.05)<br><b>p=0.0108</b> | 0.98 (0.95-1.01)<br>p=0.1444        | 0.98 (0.96-1.01)<br>p=0.25                  | 1.02 (1.00-1.03)<br>p=0.0707                       |
| <b>Model 5: SaO<sub>2</sub> as a categorical variable + risk factors</b>  |                                        |                                     |                                     |                                             |                                                    |
| time spent with SaO <sub>2</sub> <90%, %,<br>categories: >12% vs. <1.2% † | 1.12 (0.89-1.41)<br>p=0.3412           | 1.75 (1.13-2.69)<br><b>p=0.0116</b> | 0.78 (0.51-1.20)<br>p=0.2556        | 0.94 (0.65-1.37)<br>p=0.7664                | 1.33 (1.00-1.79)<br>p=0.0531                       |

Note: AHI = apnea-hypopnea index; CI = confidence interval; HR = hazard ratio; OSA = obstructive sleep apnea; SaO<sub>2</sub> = oxygen saturation

\*For a unified presentation of results from subgroup analyses, the findings shown are for a single imputed dataset no. 3. Pooled CIs across imputations for OSA-related variables were at most 2% wider than those presented.

†To attempt to replicate the results of only one clinic-based study that evaluated an association between OSA and incident cancer,(1) we used their categories for AHI (<18.7; 18.7–43; >43) and % of time spent with SaO<sub>2</sub> <90% (<1.2%; 1.2%–12%; >12%). HR (AHI >43 vs. <18.7) = 1.17, 95% CI 0.84–1.65; HR (% of sleep time spent with SaO<sub>2</sub> <90%, categories >12% vs. <1.2%) = 2.33, 95% CI 1.57–3.46. (1)

## Reference

1. Campos-Rodriguez F, Martinez-Garcia MA, Martinez M, et al. Association between obstructive sleep apnea and cancer incidence in a large multicenter Spanish cohort. *Am J Respir Crit Care Med* 2013;187:99-105.
